# Supplementary material
Source: PubMed Central journal article supplement (PMC1794315)

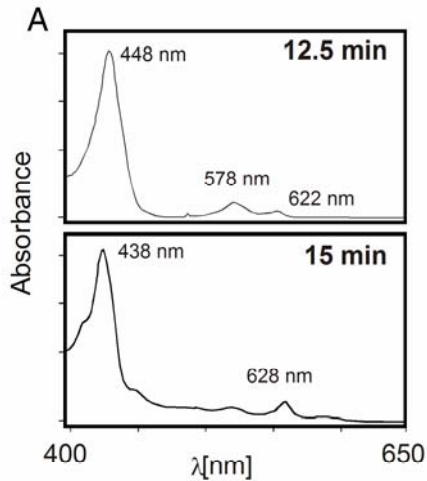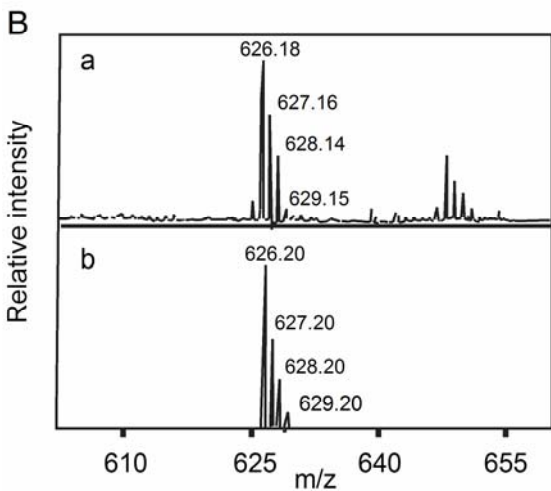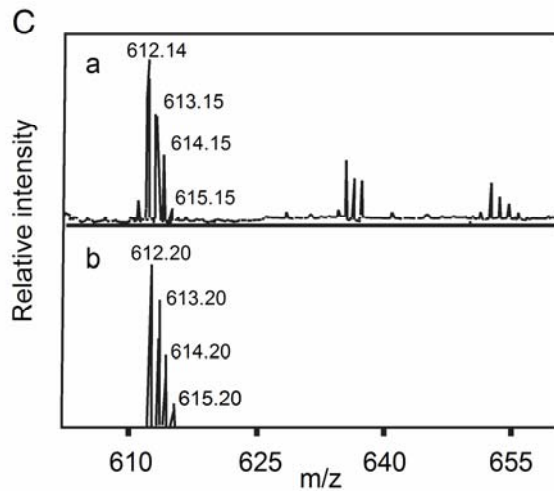

Supplement: pnas_0610934104_1.pdf [file pnas_0610934104_1.pdf]
